# Supplementary material for: Cold-induced modulation and functional analyses of the DRE-binding transcription factor gene, GmDREB3, in soybean (Glycine max L.)
Source: PubMed Central journal article supplement — J Exp Bot. 2008 Nov 6;60(1):121–35. doi: 10.1093/jxb/ern269 (PMC3071762; doi:10.1093/jxb/ern269), 2008-11-06
Supplement: ern269_1.pdf [file ern269_1.pdf]

# Cold-induced modulation and functional analyses of DRE-binding transcription factor gene, *GmDREB3*, in soybean (*Glycine max* L.)

Ming Chen<sup>1</sup>, Zhaoshi Xu<sup>1</sup>, Lanqin Xia<sup>1</sup>, Liancheng Li<sup>1</sup>, Xianguo Cheng<sup>2</sup>, Jianhui Dong<sup>1</sup>, Qiaoyan Wang<sup>1</sup>, Youzhi Ma<sup>1,\*</sup>

<sup>1</sup> National Key Facility for Crop Gene Resources and Genetic Improvement (NKFCRI)/Key Laboratory of Crop Genetics and Breeding, Ministry of Agriculture, Institute of Crop Science, Chinese Academy of Agricultural Sciences (CAAS), 12<sup>#</sup> Zhongguancun South Street, Beijing 100081, China

<sup>2</sup> Institute of Natural Resources and Regional Planning, Chinese Academy of Agricultural Sciences, 12<sup>#</sup> Zhongguancun South Street, Beijing 100081, China

**\* Corresponding author:**

Name: You-Zhi Ma

Address: Institute of Crop Science, Chinese Academy of Agricultural Sciences, 12<sup>#</sup> Zhongguancun South Street, Beijing 100081, China

Telephone: 86-10-68918789

Fax: 86-10-68918789

e-mail: mayzh@mail.caas.net.cn

A.

|           |                                                       |    |
|-----------|-------------------------------------------------------|----|
| GmDREB3   | .....                                                 | 0  |
| GmDREB2   | .....MEEAGL.G                                         | 7  |
| GmDREB1   | .....MEDR...D                                         | 5  |
| GhDBF1    | .....MELG....                                         | 4  |
| PpDBF1    | .....MVEKVVVSSLRRKRGGN                                | 17 |
| RAP2.1    | .....                                                 | 0  |
| RAP2.10   | FFETSSLLRFRVPLLSWPTCSSISPSACNRFVNITSFFFFIFKISLDRFFCGF | 55 |
| Consensus |                                                       |    |

|           |                                                           |     |                  |
|-----------|-----------------------------------------------------------|-----|------------------|
|           |                                                           | *** |                  |
| GmDREB3   | .....MAKPSS.....EKPEEHSDS.KYYKGVRRKRWGKWVSEI              | 33  |                  |
| GmDREB2   | DCCSSNTTITRKSEKR.....KQQHQQQE..KPYRGIRMRKRWGKWVAEI        | 49  |                  |
| GmDREB1   | HCCSNNSTMITTTKKRTGRRSPTSDKLNQHREKQSMKPYRGIRMRKRWGKWVAEI   | 60  |                  |
| GhDBF1    | DCCLTSSPAS..GEKR.....KLHRTQQEKPFYRGIRMRKRWGKWVAEI         | 45  |                  |
| PpDBF1    | LLAPLKRNVSSIAKKSST.....PKSGKPVGSPKVYKGVRRMRTWGKWVSEI      | 63  |                  |
| RAP2.1    | MRKRRQPPQE...EVP.....NHVATR...KPYRGIRRRKRWGKWVAEI         | 37  |                  |
| RAP2.10   | LKSPEKTTMETATEVATVTVSTPAVT..VAAVATRKRDKPYKGVRRMRTWGKWVAEI | 108 |                  |
| Consensus |                                                           |     | k g r r wgkwv ei |

|           |                                                            |     |
|-----------|------------------------------------------------------------|-----|
| GmDREB3   | RLPNSRQRIWLGSYDTPEKAARAFDAAMFCLRCRNAKENFDPNPPDIAG.....     | 82  |
| GmDREB2   | REPnkRSRIWLGSYATPVAAARAYDTAVFHLRCPSARLNFPPELLSQDDD.....    | 98  |
| GmDREB1   | REPnkRSRIWLGSYTTTPVAAARAYDTAVFYLRCP TARLNFPPELLFQDDDQEGSD. | 114 |
| GhDBF1    | REPnkRSRIWLGSYTTTPVAAARAYDTAVFYLRCP SARLNFPDLIFQEDE.....   | 94  |
| PpDBF1    | REPnkRSRIWLGSFPTAEMAAYDAAVCLRCRSVKLNFPDSPPRCAARCNSPR       | 118 |
| RAP2.1    | REPnkRSRIWLGSYTTDIAAARAYDVAVFYLRCP SARLNFPDLLLQEEEDHLS...  | 89  |
| RAP2.10   | REPnkRSRIWLGSYSTPEAAARAYDTAVFYLRCP SARLNFPPELLAGVTVTGGG..  | 161 |
| Consensus | r p n r r wlgs t aa a d a lrg nfp                          |     |

|           |                                                         |     |   |
|-----------|---------------------------------------------------------|-----|---|
| GmDREB3   | .....GTSMTPSQIQIAAQAQFANAGPHEG.....HSGRPEHPPM           | 116 |   |
| GmDREB2   | .....VSTQQQGKMSADSIKQKATQVG.....ARV                     | 123 |   |
| GmDREB1   | .....S...VQHGAAGNMSADSIKQKATQVG.....ARV                 | 140 |   |
| GhDBF1    | .....LRDISAASIRKKATEVG.....AKV                          | 114 |   |
| PpDBF1    | EVQAAATAAAVACIPSATALTVANFQSPAQTLESSPLHSSPSSSDMSSGDEDSGE | 173 |   |
| RAP2.1    | .....AATTADMPAALIREKAAEVG.....ARV                       | 112 |   |
| RAP2.10   | .....G...GGVNGGGDMSAAYIRKAAEVG.....AQV                  | 187 |   |
| Consensus |                                                         |     | a |

|           |                                                         |     |
|-----------|---------------------------------------------------------|-----|
| GmDREB3   | ESPSPSVSEGTIQTDSVPTLNGSVTDLFTP.....VGSSGYASDYGIFPGFDDF  | 166 |
| GmDREB2   | DALQTALQOSS.....STHSISSSHV..                            | 144 |
| GmDREB1   | DALQTALHHHAP.....STNSLN.....                            | 158 |
| GhDBF1    | DALQTSLHHASA.....SSSESNPTR..                            | 136 |
| PpDBF1    | DSVQSFVAEGSQISPSEVVPVLEWVKVEFGDKETVAAGDVDFDCDYFIFSEFAAD | 228 |
| RAP2.1    | DALLASAAPS.....MAHSTP.....                              | 128 |
| RAP2.10   | DALEAAGAGGNRHHHHHQHQRGNHDYVDNHSD...YRINDDLMECSKKEGFKRC  | 238 |
| Consensus |                                                         |     |

LWSY motif

|           |                                    |     |
|-----------|------------------------------------|-----|
| GmDREB3   | SGDFYVPEMPN.VNYGEENGEFIVDESFLWNF   | 198 |
| GmDREB2   | ..SYEKPDLENYPKPED.....             | 159 |
| GmDREB1   | ...LKPDLNEFPKLEELQD.....           | 174 |
| GhDBF1    | ..VFRKPDLENYPKPED.....             | 153 |
| PpDBF1    | SLLACSYNSKGRTEYLPPIETHDAALYDSTLWFF | 261 |
| RAP2.1    | ..PVIKPDLENYPKPED.....ESGDI.....   | 144 |
| RAP2.10   | NGSLERVDLNLKLPDPETSDDD.....        | 259 |
| Consensus |                                    |     |

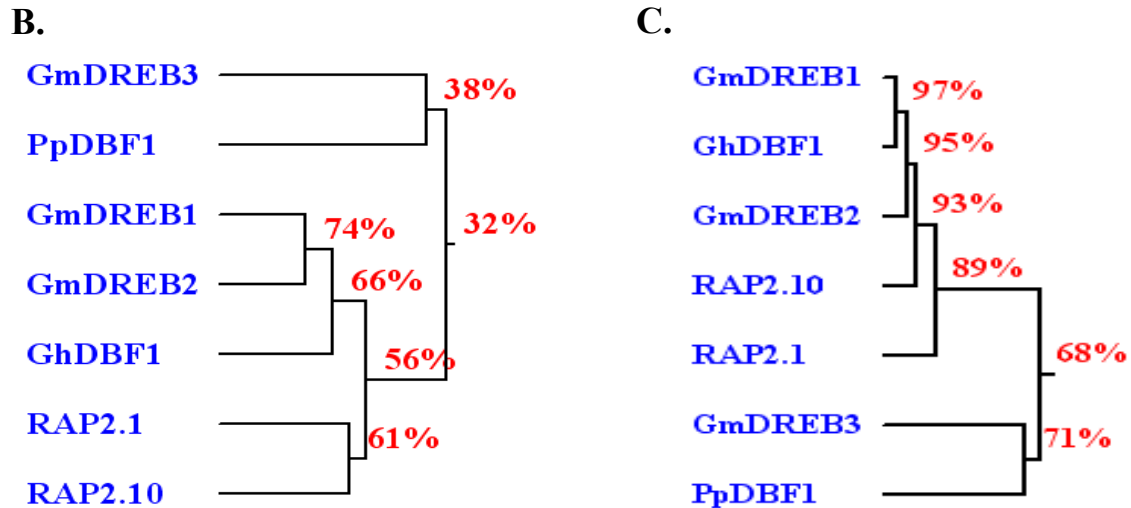

Figure S1. Amino acid sequence alignment of GmDREB3 and other members in the A-5 subgroup. A, Comparison of deduced amino acid sequence of GmDREB3 with DREB proteins from soybean, moss plant, cotton and *Arabidopsis*. The beeline above the sequences represents the conserved AP2 domain. Asterisks indicate putative nuclear localization signals. The pane shows the LWSY motifs in the C terminal of GmDREB3 and PpDBF1. Accession numbers for the DREB proteins used are as follows: GmDREB3, DQ208969; GmDREB1, AF514908; GmDREB2, DQ208968; GhDBF1, AY174160; PpDBF1, DQ202211; RAP2.1, AF003094; RAP2.10, AF003103. Homologies of the full-length amino acid (B) and AP2 domains (C) sequences in the A5 subgroup are shown with % values.

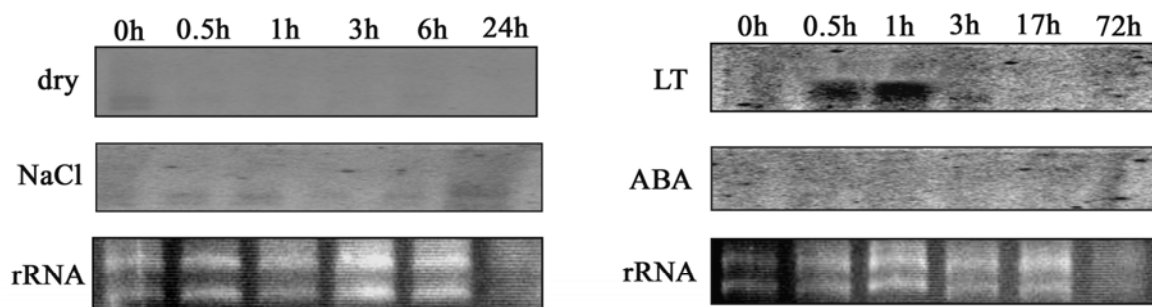

Figure S2. Expression pattern of the *GmDREB3* gene in soybean under different abiotic stresses including drought (dry), 200 mM NaCl (NaCl), low temperature 4°C (LT), and 200  $\mu$ M ABA treatment (ABA). rRNA was used as the RNA control.

```

1 .....GTTACGAGTAATCAGTTACACG. . TACATACATAATTT
      |  ||  ||  ||  ||  ||  ||  ||  ||  ||  ||  ||  ||  ||  ||  ||
1 ATGTTGGCCAGGCATATAAAGTGAAACACGTTATTATTTATATGATCGCATATAAAAGAA

37 TGAGTAACTTTTTT. . . TTTGGTGAATATAATTATGAGTAGATTTTTACTGTTGTGTAAC
   |  |  |  |  ||  |  ||  |  ||  ||  ||  ||  ||  ||  ||  ||  ||  ||  ||
61 TTGGAAGGTCTTGTAAGTTTCGAGAATGTATGTTGGTTAAAGTATAAATACATTGGTAG

94 TTAGCTTTA. . . . . CTTGTTATCTTGTATCTAGTTGG. . . TACTGCTGATACCTTG
   |||  |||  |  ||  |  |  ||  ||  |  ||  ||  ||  ||  ||  ||  ||  ||
121 TTAAC TTCATGGTAAACTCTACCGCGTCACCTTTAGTCGAAGGATTTTCATTATCTTTTG

143 ATTTTAATAGTAGTATAATTTTGTCTTTTGCCGACCCTCTCCAGAAAAAAGAAACCCT. C
     ||  |  |  ||  ||  ||  ||  ||  ||  ||  ||  ||  ||  ||  ||  ||  ||
181 ATCAAATCAATAATATAATATAATGTCATGTGTATTAATTTTTTATATTCTAATTTTAAT

202 ATTCCATTTTATATAATT. AAACCTTTTTTATTTATTAATTTTACTTATTAATAATAAAC
     |||  |||  ||  ||  ||  ||  ||  ||  ||  ||  ||  ||  ||  ||  ||  ||
241 ATTTCATTAATATAATTTAAAAAATGAATATATTTACAAAATGATCCTGAATTAATT. T

261 ATGAAGTCCTATACATATTAAGGGAAAATAAAAGGGATTAGTTGATGTGAGGAAAGTGA
     |  ||  |  |  ||  ||  ||  ||  ||  ||  ||  ||  ||  ||  ||  ||  ||
300 GTAAAATTTAAACTAATTTGCATCTCATCCGATCTCAGTGGCTCACGCATTCTCCGTCA

321 AAACGATGGAATGCATTGCACCAG. GTGGTTGTGGTCATACGGGGCAT. . TCTGAATCGG
     ||  ||  |  |  ||  ||  ||  ||  ||  ||  ||  ||  ||  ||  ||  ||
360 TCGCGTCTTCTCCCTCTCTGCCGACACCTTCGCCGCCGATCCCGTCTTGGTCTCCACCGC

378 GATTAGAAAGGTCATGATCGAATCAGATTATGACAATGGGAGAACATAAGCATCACACAT
     |  ||  ||  ||  |  |  ||  ||  ||  ||  ||  ||  ||  ||  ||  ||
420 CGCCAAAATCAAAGAGACGCGGT. . GGCTCTGGCGGCGCTCCAAGACCCAGCTCCAGTGG

438 GACGTAAAATATACACGTGGGGCATATGTCTCCAACCCTGTCTCTTTACTCTTCAGCTAC
     |  ||  ||  |  |  ||  ||  ||  ||  ||  ||  ||  ||  ||  ||  ||
478 CTCCTATGATTCCCCCTCGGGACCCGTCCTCTGGTCTGTTTCTTCTGGTCTCCTACGTT

498 TTTTTCTTAGAATGTTTAATACTTCTACGATTAATAATTAATTTTCTGTT. GTTAAACAA
     ||  |  |  |  ||  |  |  |  |  |  |  |  ||  ||  ||  ||  ||  ||
538 TTCTACACATGTTGCGCACCGTCTTCGTCGTCGTAAGCTCGTTTTCTTTTCTTCTTCTTCTA

557 GTAAAATAGGTG. GAGAAAAAAACCATTTGATAGCGAGATTAATAATATGCTACTTGATA
     |  |  |  |  |  |  |  |  |  |  ||  ||  ||  ||  ||  ||  ||
598 CCACGCCATTTCCGCGTTCATGTCTTTTCTGTGGCTGGAGTTCTCGCGATCCTCTTACC

```

616 GTAGTTTTTTGATATTTTTATGGTAGCTAAGAATTTTAGTAGTAAGATCAAAAATAAAAAA  
| | | | | | | | | | | | | | | | | | | |  
658 ACGCTCCCGTTCTCCGTTATGTTTGGTTACAGGTTCTGG. . . . . ACCGCAGTACG. . .  
  
676 TTAATTTCGTGATAAAAATCAATTCAAAAATGTCCGATCAATGTATTATAATATTTTCGAT  
| | | | | | | | | | | | | | | | | | | |  
708 TGGCGGCGCAAGGCGAGTGCCTGCCACTCGTGCTCAACTGCCAGATTGCGCTGCTCGGGT  
  
736 AACATGTGATAATTCTCGCATCACTTACTACATTTCAAAATAAATTAATTACAAATGCA.  
| | | | | | | | | | | | | | | | | | | |  
768 GCAACTTGGTTTGCCACGTGGCGGTGTCT. . . TGTTGCATTTTTTTTACAGGTGGGTGTAA  
  
795 TAAAAAATTGCAAGAACTATATAATAAAAATCATTAGAATAATTTATACCAATTT.  
| | | | | | | | | | | | | | | | | | | |  
825 CGGGATTGGCGGTGGGTTCGTCATTCCTGCT. CAACTGTGCTATTTTGTTCCTTTTC  
  
854 . ACATTTTTATCCTTTTACGAAATGGTAAACTGAATCCCATCGATTGATGGATGCAAGG  
| | | | | | | | | | | | | | | | | | | |  
884 TAAATTTTTATCACGTTGTGAGAATGGTA. . . GCATTGC. TCGATCGTTC. TGCTCCT  
  
913 CAGCGATTTTTTTTTTAACAATTTATGAAAATGTTTAATTAATCTTGACATAATAAAAAAC  
| | | | | | | | | | | | | | | | | | | |  
938 CTGTCTTACGCGCTGGAAAAGAAGCACATAGTAATAAATTGAAGTCCA. ATAAAAGCAC  
  
973 GGGCACTGATATGCTTAATAAAAATATTACTGTATACTGAAAAGTATTCAACCTCATGAA  
| | | | | | | | | | | | | | | | | | | |  
997 AGATTCATTGAAGGTTAAGTCATGAGTACCGTTGCCAATGATGGCTTGAAGGTTTTAGG  
  
1033 ATTTA. . . TTTCTTTTGTAATAAA. . TATTTAAAATTTAAGTTCATACTGATAGATGT  
| | | | | | | | | | | | | | | | | | | |  
1057 TTCTAAACCATCATGTATGAGTAAAAATGTCTTTTGAAGATCTGACATGGATACAAAC  
  
1088 TTAAATTTTATCTTGTTCCTAATAAATAATATACTAATTATTCTAAAAATAATTTAA  
| | | | | | | | | | | | | | | | | | | |  
1117 ACGAATTTGAGATATATAATGTTGGATGAAAAAGCT. . CTAAACAAAACATACATAAAA  
  
1148 TGTAGTAATAATTCCTTAATGTTGAAGTAGTAGTATTAATGTTTTTTTTCTAGAGTT  
| | | | | | | | | | | | | | | | | | | |  
1175 TGCAGTTACACACGAGATATTGC. ATGATGGGAGCATTTTATATTATTCATTTTGAGTGA  
  
1208 ACTTTCTGTAGATACTGAATAAATAATAGTATTTGATTCTTA ACTATCAAAATCACTTCA  
| | | | | | | | | | | | | | | | | | | |  
1234 ATTTTTTAAAATTAATAATTATA. . . AATATTTAAATATTTAT. . . AAAATTAACA



```

1920 TAAGTTTTCAGTTCTCACAAATAAATAAAAAAAAAATTGTTTTTCGT. GTGGAAACAAAAAAA
    | | |||| | | | | | | | | | | | | | | | | | | | | | | | | | |
1924 TTAATTTT. ATTAATTACTACTAGGTAGCTGGTTTTTAATAGGTAGTAGGTAGGTGTAAT

1979 CAATTCAAAAACAAACATATGATG
    | | | | | | | | | | | | | | | | | | | | | | | | | | | | | |
1983 CGTTGTCTTCCTGCAGATATG. . .

```

**Figure S3. Promoter sequence alignment of *GmDREB3* (upper line) and *GmDREB2* (low line) in the soybean genome. The promoter sequence of *GmDREB2* was searched from Scaffold 26 in the Soybean genome project ([www.phytozome.net/soybean.php](http://www.phytozome.net/soybean.php)). The results of alignment indicated that the promoter of *GmDREB3* shared 43.5% identity with the promoter of *GmDREB2*.**
